# Supplementary material for: The pH Influence on the Water-Splitting Electrocatalytic Activity of Graphite Electrodes Modified with Symmetrically Substituted Metalloporphyrins
Source: MDPI journal article supplement (doi:10.3390/nano12213788), 2022-10-27
Supplement: s1 [file s1]

Supplementary material

# The pH Influence on the Water-Splitting Electrocatalytic Activity of Graphite Electrodes Modified with Symmetrically Substituted Metalloporphyrins

Bogdan-Ovidiu Taranu <sup>1,\*</sup> and Eugenia Fagadar-Cosma <sup>2,\*</sup>

<sup>1</sup> National Institute for Research and Development in Electrochemistry and Condensed Matter, Dr. A. Paunescu Podeanu Street No. 144, 300569 Timisoara, Romania

<sup>2</sup> Institute of Chemistry “Coriolan Dragulescu”, Mihai Viteazu Ave. 24, 300223 Timisoara, Romania

\* Correspondence: b.taranu84@gmail.com (B.-O.T.); efagadar@yahoo.com or efagadarcosma@acad-icht.tm.edu.ro (E.F.-C.)

## Scheme

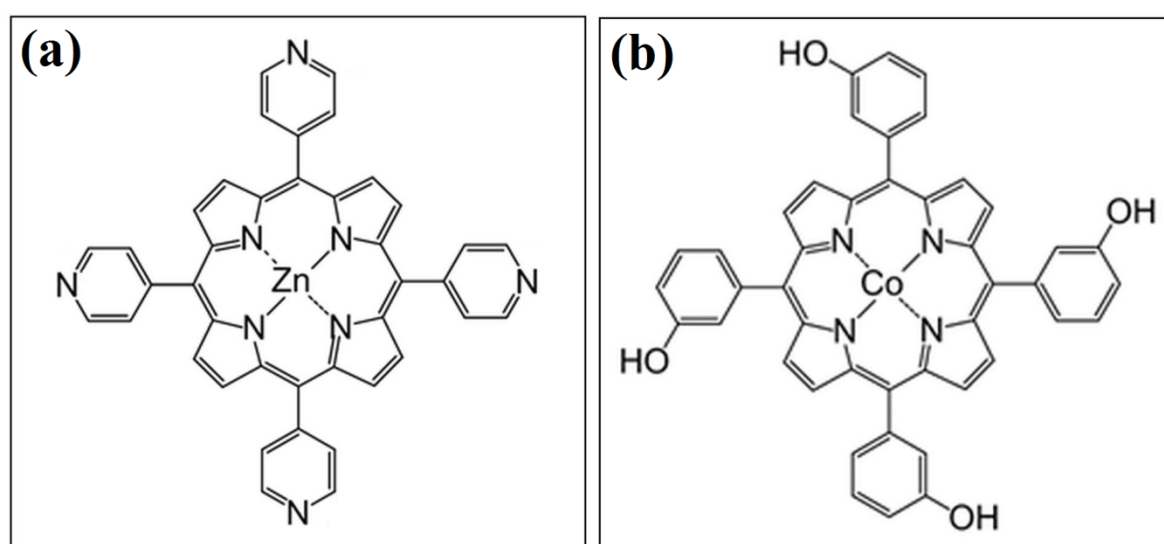

**Scheme S1.** The chemical structures of: (a) Zn(II) 5,10,15,20-tetrakis(4-pyridyl)-porphyrin and (b) Co(II) 5,10,15,20-tetrakis(3-hydroxyphenyl)-porphyrin.

## Equations

Equations (S1) – (S5) [1–3] were employed in the present study as follows: Equation (S1) was used to express the electrochemical potential values measured *vs.* the Ag/AgCl(sat. KCl) reference electrode against the Reversible Hydrogen Electrode (RHE); the O<sub>2</sub> and H<sub>2</sub> overpotential values were calculated with Equations (S2) and (S3), and the Tafel slope was determined with Equation (S4).

$$E_{\text{RHE}} = E_{\text{Ag/AgCl(sat. KCl)}} + 0.059 \times \text{pH} + 0.197 \quad (\text{S1})$$

$$\eta_{\text{O}_2} = E_{\text{RHE}} - 1.23 \quad (\text{S2})$$

$$\eta_{\text{H}_2} = |E_{\text{RHE}}| \quad (\text{S3})$$

$$\eta = b \times \log(i) + a \quad (\text{S4})$$

Where:  $E_{\text{RHE}}$  is the reversible hydrogen electrode potential [V],  $E_{\text{Ag/AgCl(sat. KCl)}}$  is the potential *vs.* the Ag/AgCl (sat. KCl) reference electrode [V],  $\eta_{\text{O}_2}$  is the oxygen evolution overpotential and  $\eta_{\text{H}_2}$  is the hydrogen evolution overpotential [V],  $\eta$  is either the oxygen

or the hydrogen evolution overpotential [V],  $i$  is the current density [ $\text{mA}/\text{cm}^2$ ] and  $b$  is the Tafel slope.

Equation (S5) is the Randles-Sevcik equation that can be employed to calculate the electroactive surface area (EASA) of an electrode, as well as the diffusion coefficient of the electroactive species.

$$I_p = (2.69 \times 10^5) \times n^{3/2} \times A \times D^{1/2} \times C \times v^{1/2} \quad (\text{S5})$$

Where:  $I_p$  = the peak current [A];  $n$  = the number of electrons involved in the redox process at  $T = 298 \text{ K}$ ;  $A$  = the surface area of the working electrode [ $\text{cm}^2$ ];  $D$  = the diffusion coefficient of the electroactive species [ $\text{cm}^2/\text{s}$ ];  $C$  = the bulk concentration of the electroactive species [M] and  $v$  = the scan rate [V/s].

For the ferrocyanide/ferricyanide redox system used in the present study,  $n = 1$  and the theoretical value of the diffusion coefficient reported in the literature is  $6.7 \times 10^{-6} \text{ cm}^2/\text{s}$  [4,5].

### Figures

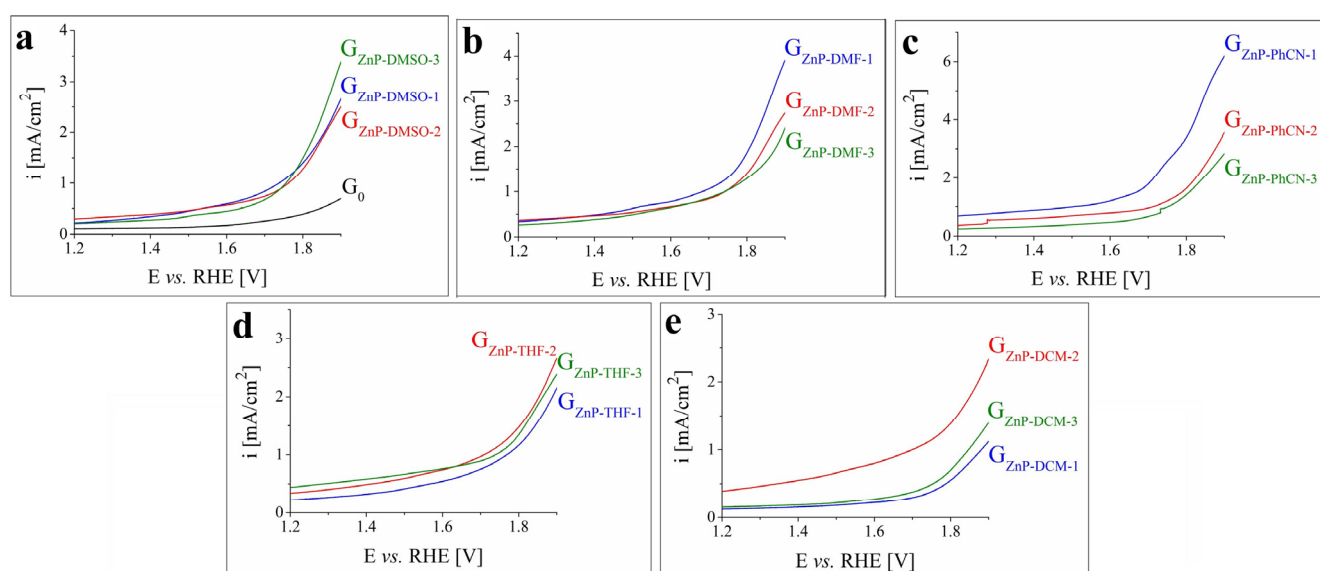

**Figure S1.** Anodic polarization curves recorded in 0.1 M KCl solution on the graphite electrodes modified with ZnP, applied from: (a) DMSO, (b) DMF, (c) PhCN, (d) THF and (e) DCM. The samples are labelled according to Table 1 from the main text.  $G_0$  is the unmodified graphite electrode.

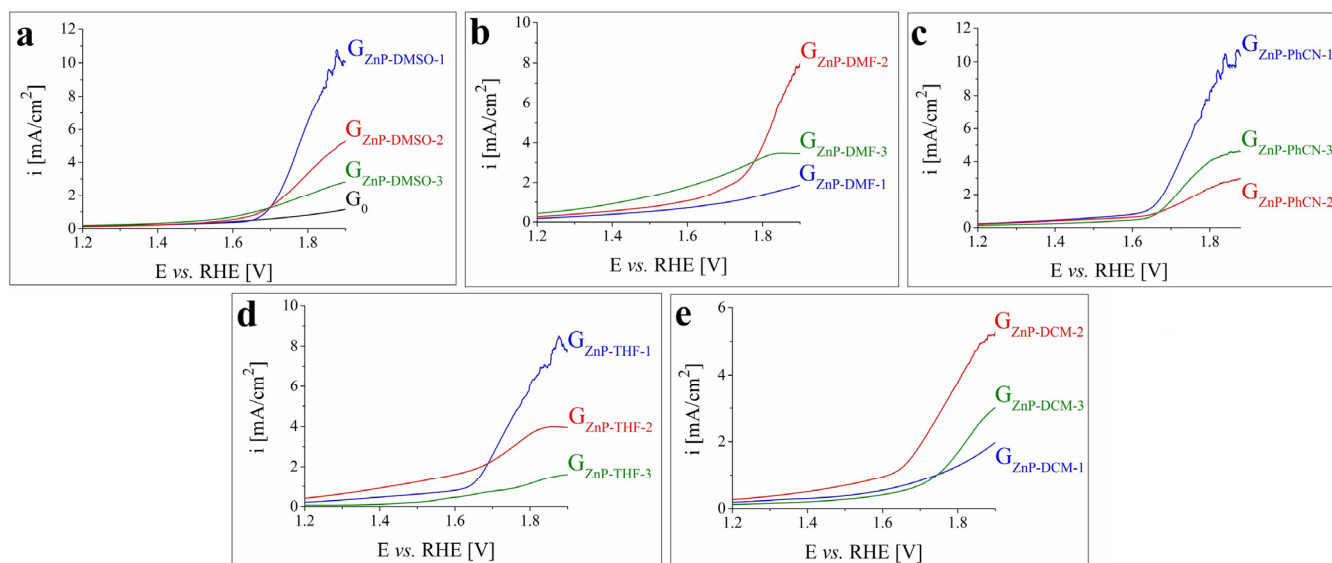

**Figure S2.** Anodic polarization curves recorded in 0.1 M KOH solution on the graphite electrodes modified with ZnP, applied from: (a) DMSO, (b) DMF, (c) PhCN, (d) THF and (e) DCM. The samples are labelled according to Table 1 from the main text.  $G_0$  is the unmodified graphite electrode.

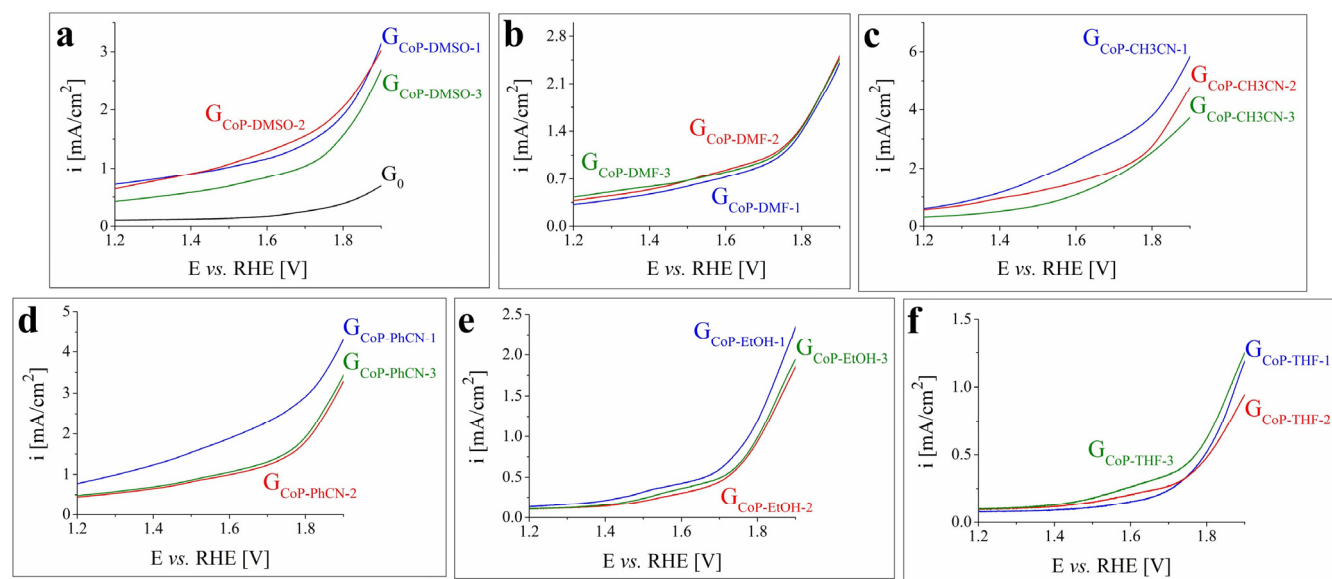

**Figure S3.** Anodic polarization curves recorded in 0.1 M KCl solution on the graphite electrodes modified with CoP, drop-casted from: (a) DMSO, (b) DMF, (c) CH<sub>3</sub>CN, (d) PhCN, (e) EtOH and (f) THF. The samples are labelled according to Table 1 from the main text.  $G_0$  is the unmodified graphite electrode.

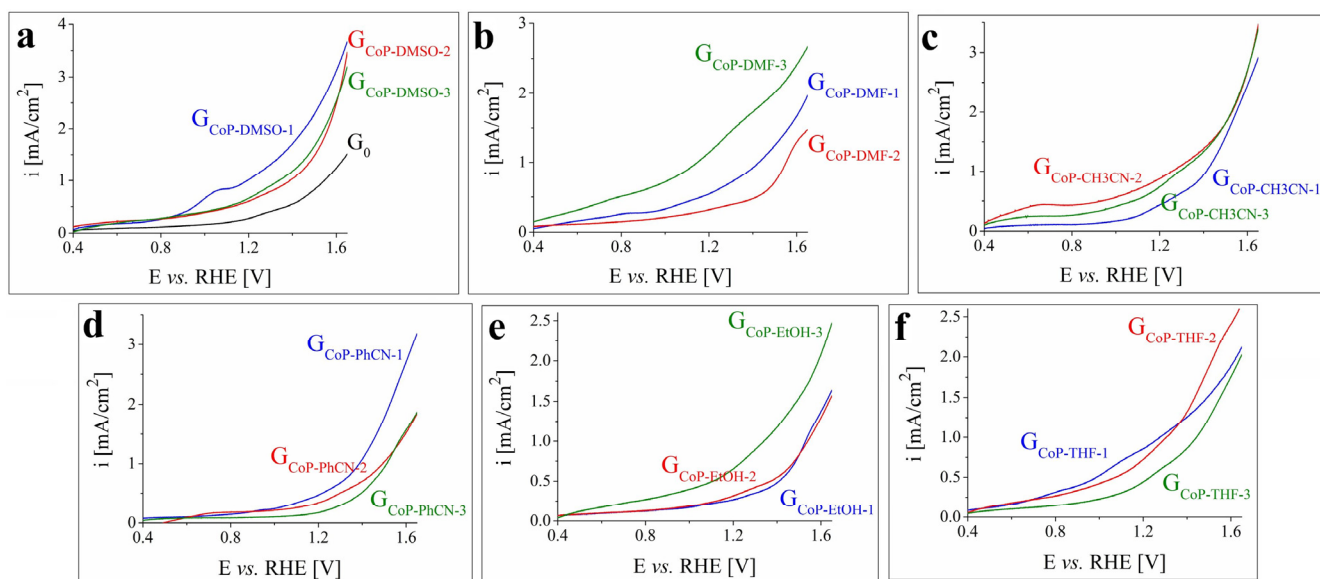

**Figure S4.** Anodic polarization curves recorded in 0.1 M  $\text{H}_2\text{SO}_4$  solution on the graphite electrodes modified with CoP, drop-casted from: (a) DMSO, (b) DMF, (c)  $\text{CH}_3\text{CN}$ , (d) PhCN, (e) EtOH and (f) THF. The samples are labelled according to Table 1 from the main text.  $G_0$  is the unmodified graphite electrode.

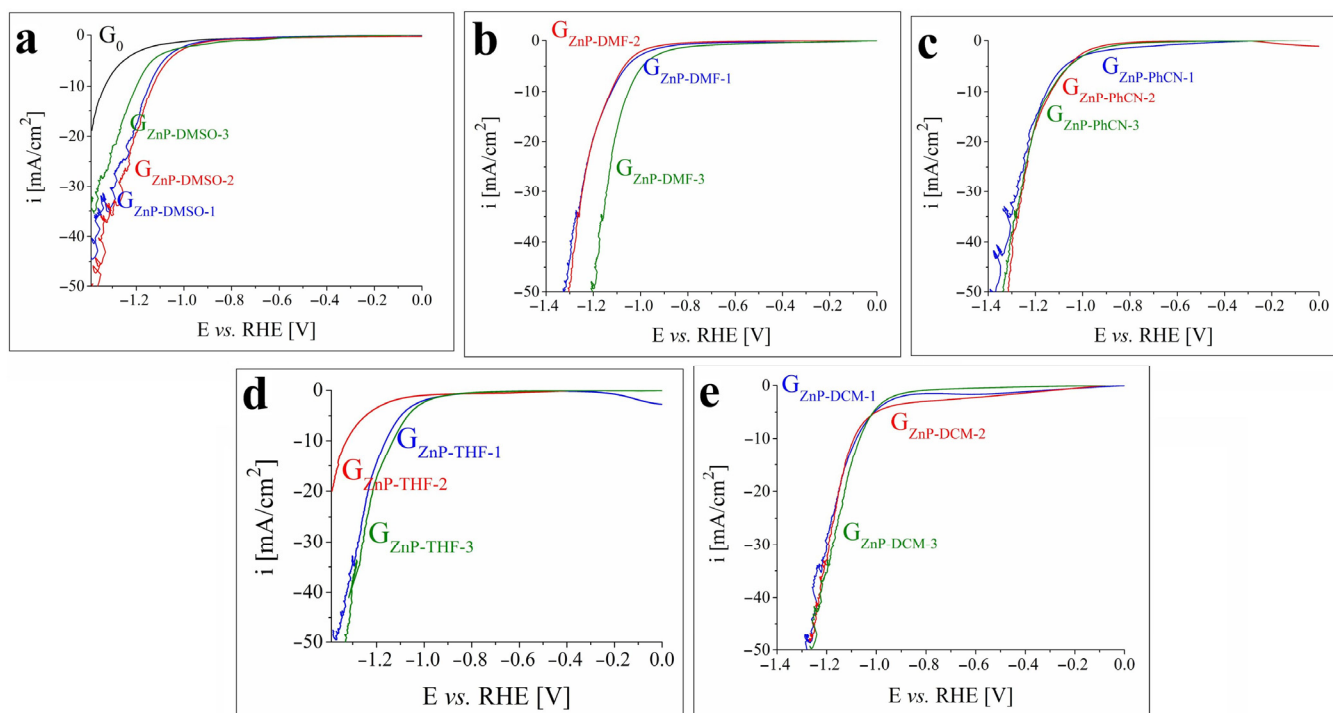

**Figure S5.** Cathodic polarization curves obtained in 0.1 M KCl solution on the graphite electrodes modified with ZnP, applied from: (a) DMSO, (b) DMF, (c) PhCN, (d) THF and (e) DCM. The samples are labelled according to Table 1 from the main text.  $G_0$  is the unmodified graphite electrode.

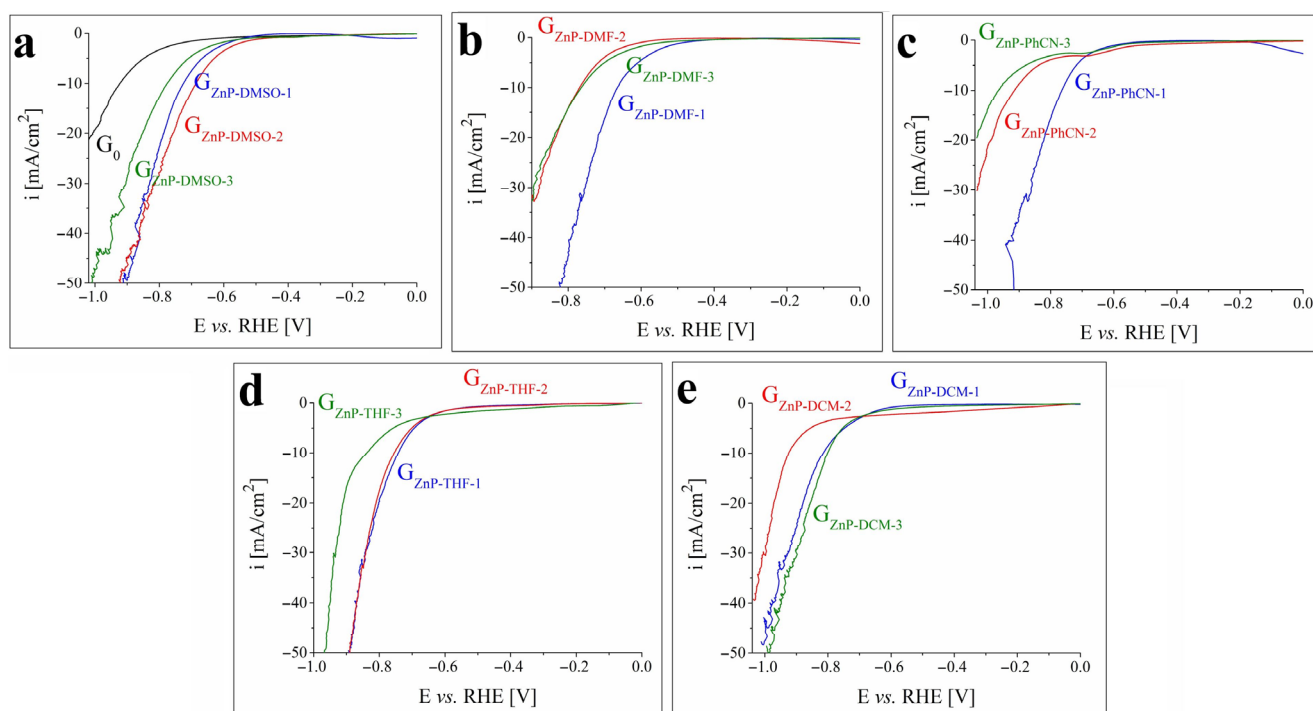

**Figure S6.** Cathodic polarization curves obtained in 0.1 M KOH solution on the graphite electrodes modified with ZnP, applied from: (a) DMSO, (b) DMF, (c) PhCN, (d) THF and (e) DCM. The samples are labelled according to Table 1 from the main text.  $G_0$  is the unmodified graphite electrode.

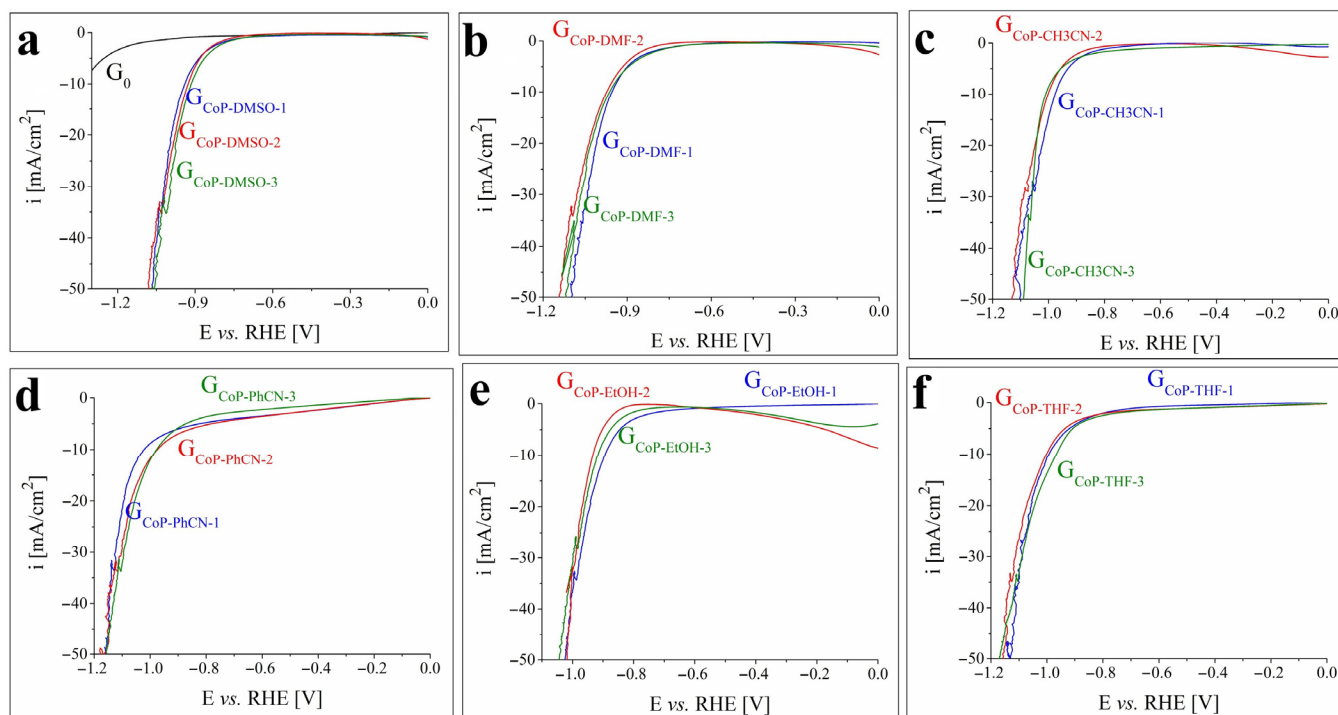

**Figure S7.** Cathodic polarization curves obtained in 0.1 M KCl solution on the graphite electrodes modified with CoP, drop-casted from: (a) DMSO, (b) DMF, (c)  $\text{CH}_3\text{CN}$ , (d) PhCN, (e) EtOH and (f) THF. The samples are labelled according to Table 1 from the main text.  $G_0$  is the unmodified graphite electrode.

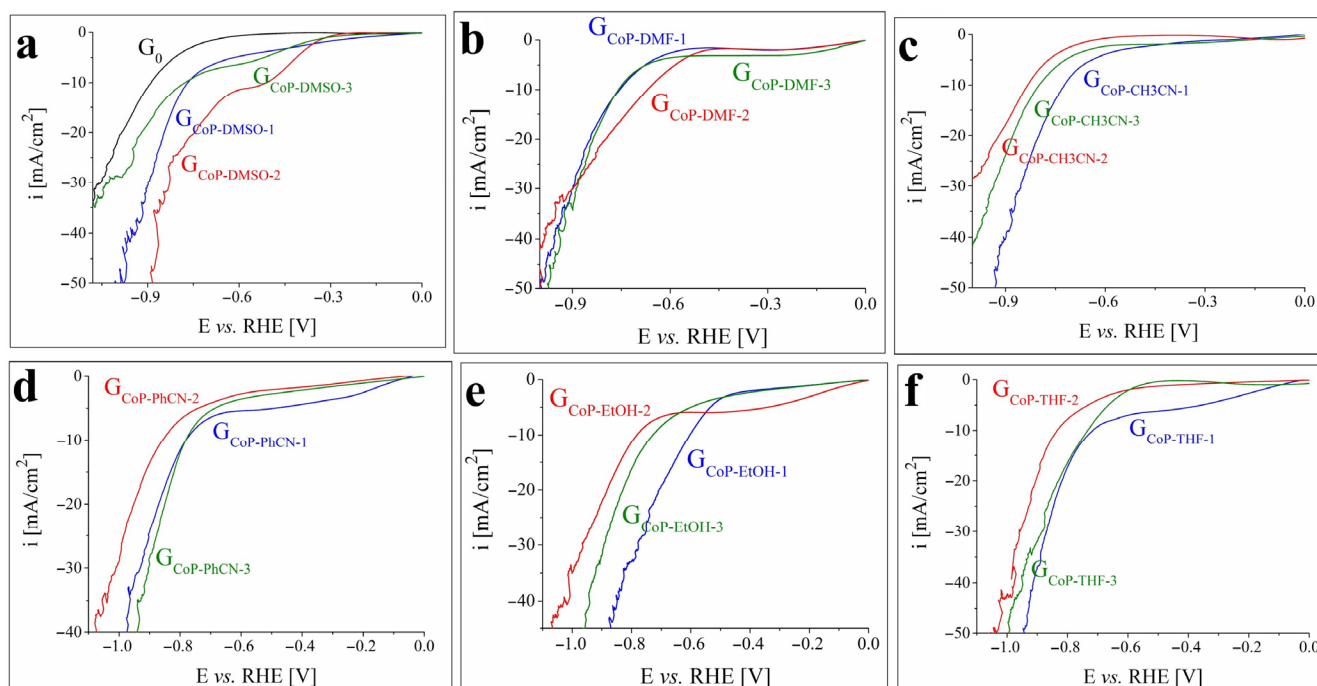

**Figure S8.** Cathodic polarization curves obtained in 0.1 M H<sub>2</sub>SO<sub>4</sub> solution on the graphite electrodes modified with CoP, drop-casted from: (a) DMSO, (b) DMF, (c) CH<sub>3</sub>CN, (d) PhCN, (e) EtOH and (f) THF. The samples are labelled according to Table 1 from the main text. G<sub>0</sub> is the unmodified graphite electrode.

**Table**

**Table S1.** The OER and HER activities of G<sub>CoP-DMSO-1</sub>, of G<sub>ZnP-DMF-1</sub> and of several reported electrodes.

| Catalyst                                             | Substrate | Electrolyte                          | Overpotential [V]                  | Tafel slope [V/dec] | Catalysed re-action | Ref. |
|------------------------------------------------------|-----------|--------------------------------------|------------------------------------|---------------------|---------------------|------|
| Zn-TPP [a]                                           | graphene  | 0.5 M H <sub>2</sub> SO <sub>4</sub> | ~ 0.48<br>at -3 mA/cm <sup>2</sup> | -                   | HER                 | [6]  |
| Zn-TAPP [b]                                          | graphene  | 0.5 M H <sub>2</sub> SO <sub>4</sub> | ~ 0.48<br>at -3 mA/cm <sup>2</sup> | -                   | HER                 | [6]  |
| Zn-TPyP [c]                                          | graphene  | 0.5 M H <sub>2</sub> SO <sub>4</sub> | ~ 0.56<br>at -3 mA/cm <sup>2</sup> | -                   | HER                 | [6]  |
| ZnTAPP-NA [d]                                        | GCE [e]   | 1 M KOH                              | 0.546<br>at -10 mA/cm <sup>2</sup> | 0.121               | HER                 | [7]  |
| ZnTAPP-NA                                            | GCE       | 1 M KOH                              | -                                  | 0.313               | OER                 | [7]  |
| CoTAPP-NA [f]                                        | GCE       | 1 M KOH                              | 0.47<br>at -10 mA/cm <sup>2</sup>  | 0.11                | HER                 | [7]  |
| CoTAPP-NA                                            | GCE       | 1 M KOH                              | 0.416<br>at 10 mA/cm <sup>2</sup>  | 0.068               | OER                 | [7]  |
| CoTcPP/ZrP [g]                                       | GCRDE [h] | 0.1 M KOH                            | 0.467<br>at 10 mA/cm <sup>2</sup>  | 0.076               | OER                 | [8]  |
| (Co-P) <sub>0.5</sub> (Fe-P) <sub>0.5</sub> @CNT [i] | GCRDE     | 0.1 M KOH                            | 0.42<br>at 10 mA/cm <sup>2</sup>   | -                   | OER                 | [9]  |
| 3,4,5-OMe-CoP/CNT [j]                                | GCE       | 1 M KOH                              | 0.482<br>at 10 mA/cm <sup>2</sup>  | 0.081               | OER                 | [10] |
| 2,4,6-OMe-CoP/CNT [k]                                | GCE       | 1 M KOH                              | 0.5<br>at 10 mA/cm <sup>2</sup>    | 0.09                | OER                 | [10] |
| 1/CNTs [l]                                           | RDE [m]   | 1 M KOH                              | 0.407<br>at 10 mA/cm <sup>2</sup>  | 0.06                | OER                 | [11] |
| 2/CNTs [n]                                           | RDE       | 1 M KOH                              | 0.48<br>at 10 mA/cm <sup>2</sup>   | 0.072               | OER                 | [11] |
| 1/MWCNT [o]                                          | GCE       | 0.1 M PBS                            | 0.79                               | -                   | OER                 | [12] |

| at 10 mA/cm <sup>2</sup>                                              |          |                                      |                                    |       |     |           |
|-----------------------------------------------------------------------|----------|--------------------------------------|------------------------------------|-------|-----|-----------|
| 1/MWCNT                                                               | GCE      | 1 M KOH                              | 0.48<br>at 10 mA/cm <sup>2</sup>   | -     | OER | [12]      |
| 1/MWCNT/Py-Py [p]                                                     | GCE      | 0.1 M PBS                            | 0.65<br>at 10 mA/cm <sup>2</sup>   | -     | OER | [12]      |
| 1/MWCNT/Py-Py                                                         | GCE      | 1 M KOH                              | 0.44<br>at 10 mA/cm <sup>2</sup>   | -     | OER | [12]      |
| CoTPP-SD [q]                                                          | CFP [r]  | 1 M KOH                              | 0.475<br>at -10 mA/cm <sup>2</sup> | -     | HER | [13]      |
| CoTPP-SD                                                              | CFP      | 1 M KOH                              | 0.67<br>at 10 mA/cm <sup>2</sup>   | -     | OER | [13]      |
| CoCOP [s]                                                             | CFP      | 1 M KOH                              | 0.31<br>at -10 mA/cm <sup>2</sup>  | 0.161 | HER | [13]      |
| CoCOP                                                                 | CFP      | 1 M KOH                              | 0.35<br>at 10 mA/cm <sup>2</sup>   | 0.151 | OER | [13]      |
| CoTCPP [t]                                                            | FTO/Ag   | 0.5 M H <sub>2</sub> SO <sub>4</sub> | 0.666<br>at -10 mA/cm <sup>2</sup> | 0.264 | HER | [14]      |
| CoTCPP polymer [u]                                                    | FTO/Ag   | 0.5 M H <sub>2</sub> SO <sub>4</sub> | 0.475<br>at -10 mA/cm <sup>2</sup> | 0.197 | HER | [14]      |
| PIZA-1-400 [v]                                                        | FTO      | 1 M KOH                              | 0.43<br>at 10 mA/cm <sup>2</sup>   | 0.052 | OER | [15]      |
| CeO <sub>2</sub> @PIZA-1-400 [w]                                      | FTO      | 1 M KOH                              | 0.37<br>at 10 mA/cm <sup>2</sup>   | 0.048 | OER | [15]      |
| CoTMPyP/ERGO [x]                                                      | GCE      | 0.1 M KOH                            | 0.347<br>at -1 mA/cm <sup>2</sup>  | 0.099 | HER | [16]      |
| CoTMPyP/ERGO                                                          | GCE      | 1 M KOH                              | 0.315<br>at -1 mA/cm <sup>2</sup>  | 0.096 | HER | [16]      |
| Co-MPPy-1 [y]                                                         | RDE      | 1 M NaOH                             | 0.42<br>at 10 mA/cm <sup>2</sup>   | 0.058 | OER | [17]      |
| Co-2DP [z]                                                            | Ti foil  | 1 M KOH                              | 0.367<br>at -1 mA/cm <sup>2</sup>  | 0.126 | HER | [18]      |
| rGO/(Ni <sup>2+</sup> -THPP/Co <sup>2+</sup> -THPP) <sub>8</sub> [aa] | RDE      | 1 M KOH                              | 0.33<br>at 10 mA/cm <sup>2</sup>   | 0.05  | OER | [19]      |
| CoP-2ph-CMP-800 [ab]                                                  | GCE      | 1 M KOH                              | 0.36<br>at -10 mA/cm <sup>2</sup>  | 0.121 | HER | [20]      |
| CoP-3ph-CMP-800 [ac]                                                  | GCE      | 1 M KOH                              | 0.38<br>at -10 mA/cm <sup>2</sup>  | -     | HER | [20]      |
| CoP-4ph-CMP-800 [ad]                                                  | GCE      | 1 M KOH                              | 0.44<br>at -10 mA/cm <sup>2</sup>  | -     | HER | [20]      |
| CoP-2ph-CMP-800                                                       | GCE      | 1 M KOH                              | 0.37<br>at 10 mA/cm <sup>2</sup>   | 0.086 | OER | [20]      |
| CoP-3ph-CMP-800                                                       | GCE      | 1 M KOH                              | 0.41<br>at 10 mA/cm <sup>2</sup>   | -     | OER | [20]      |
| CoP-4ph-CMP-800                                                       | GCE      | 1 M KOH                              | 0.43<br>at 10 mA/cm <sup>2</sup>   | -     | OER | [20]      |
| (CoP) <sub>n</sub> -MWCNTs [ae]                                       | GCE      | 1 M KOH                              | 0.29<br>at 1 mA/cm <sup>2</sup>    | 0.055 | OER | [21]      |
| CoP-TIPS/MWCNTs [af]                                                  | GCE      | 1 M KOH                              | 0.44<br>at 1 mA/cm <sup>2</sup>    | -     | OER | [21]      |
| [ERGO@CoTMPyP] <sub>7</sub> /PDDA/4-ABA/GC [ag]                       | GCE      | 0.1 M KOH                            | 0.474<br>at -1 mA/cm <sup>2</sup>  | 0.116 | HER | [22]      |
| GZnP-DMF-1                                                            | graphite | 1 M KOH                              | 0.52<br>at -10 mA/cm <sup>2</sup>  | 0.15  | HER | This work |
| GCoP-DMSO-1                                                           | graphite | 0.5 M H <sub>2</sub> SO <sub>4</sub> | 0.51<br>at 10 mA/cm <sup>2</sup>   | 0.27  | OER | This work |

[a] Zn-TTP = 5,10,15,20-tetraphenyl-21H,23H-porphine

[b] Zn-TAPP = 5,10,15,20-tetrakis(4-aminophenyl)-21H,23H-porphine

[c] Zn-TPyP = 5,10,15,20-tetrakis(4-pyridyl)-21H,23H-porphine

[d] ZnTAPP-NA = Zn(II) 5,10,15,20-tetra(4-aminophenyl)-21H,23H-porphyrin - ferrocene-1,1'-dicarbaldehyde

[e] GCE = glassy carbon electrode

[f] CoTAPP-NA = Co(II) 5,10,15,20-tetra(4-aminophenyl)-21H,23H-porphyrin - ferrocene-1,1'-dicarbaldehyde

[g] CoTCPP/ZrP = Co(II) meso-tetra(4-carboxyphenyl)porphyrin/zirconium phosphate

[h] GCRDE = glassy carbon rotating disk electrode

- [i] (Co-P)<sub>0.5</sub>(Fe-P)<sub>0.5</sub>@CNT = hybrid formed by loading Co(II) tetrakis(pentafluorophenyl)porphyrin and Fe(III) chloride tetrakis(pentafluorophenyl)porphyrin on carbon nanotubes
- [j] 3,4,5-OMe-CoP/CNT = Co(II) 5,10,15,20-tetra(3,4,5-trimethoxyphenyl)porphyrin / carbon nanotubes
- [k] 2,4,6-OMe-CoP/CNT = Co(II) 5,10,15,20-tetra(2,4,6-trimethoxyphenyl)porphyrin / carbon nanotubes
- [l] 1/CNTs = Co(II) tetra(phenyl)porphyrin / carbon nanotubes
- [m] RDE = rotating ring-disk electrode
- [n] 2/CNTs = Co(II) tetra(pentafluorophenyl)porphyrin / carbon nanotubes
- [o] 1/MWCNT = Co(II) tetraphenylporphyrin immobilized on multi-walled carbon nanotubes
- [p] 1/MWCNT/Py-Py = nanocomposite with pyrene-pyridine hybrid used as an axial ligand to bridge Co(II) tetraphenylporphyrin immobilized on multi-walled carbon nanotubes
- [q] CoTPP-SD = Co(II) 5,10,15,20-tetrakis(4-aminophenyl)porphyrin – salicylaldehyde
- [r] CFP = carbon fibre paper
- [s] CoCOP = Co(II) 5,10,15,20-tetrakis(4-aminophenyl)porphyrin-based covalent organic polymer
- [t] CoTCPP = Co(II) meso-tetra(4-carboxyphenyl)porphyrin
- [u] CoTCPP polymer = crystalline Co(II) meso-tetra(4-carboxyphenyl)porphyrin-based polymeric system
- [v] PIZA-1-400 = Co(II) 5,10,15,20-(4-carboxyphenyl)porphyrin network thin film calcined at 400 °C
- [w] CeO<sub>2</sub>@PIZA-1-400 = Co(II) 5,10,15,20-(4-carboxyphenyl)porphyrin network thin film with encapsulated CeO<sub>2</sub> and calcined at 400 °C
- [x] CoTMPyP/ERGO = tetrakis(N-methylpyridyl)porphyrinato cobalt / electrochemically reduced graphene oxide
- [y] Co-MPPy-1 = Co(II)-porphyrin / pyrene comprised conjugated microporous polymer
- [z] Co-2DP = multilayer 2D polymer based on Co(II) 5,10,15,20-tetrakis(4-aminophenyl)-21H,23H-porphyrin and 2,5-dihydroxy-terephthalaldehyde
- [aa] rGO/(Ni<sup>2+</sup>-THPP/Co<sup>2+</sup>-THPP)<sub>8</sub> = multilayer structure based on Ni(II) and Co(II) 5,10,15,20-tetrakis(4-hydroxyphenyl)porphyrins assembled on reduced graphene oxide sheets
- [ab] CoP-2ph-CMP-800, [ac] CoP-3ph-CMP-800 and [ad] CoP-4ph-CMP-800 = conjugated mesoporous polymer based on Co-porphyrins and pyrolyzed at 800 °C
- [ae] (CoP)<sub>n</sub>-MWCNTs = multilayer covalent Co(II) 5,10,15,20-tetraethynyl-porphyrin framework on multi-walled carbon nanotubes
- [af] CoP-TIPS/MWCNTs = Co(II) 5,10,15,20-tetrakis(triisopropylsilylethynyl)porphyrin mixed with multi-walled carbon nanotubes
- [ag] [ERGO@CoTMPyP]<sub>7</sub>/PDDA/4-ABA/GC = multilayer films containing tetrakis(N-methylpyridyl)porphyrinato cobalt, on treated glassy carbon electrode

## References

- [1] I. Fratilescu, A. Lascu, B.O. Taranu, C. Epuran, M. Birdeanu, A.-M. Macsim, E. Tanasa, E. Vasile, E. Fagadar-Cosma, One A<sub>3</sub>B porphyrin structure—Three successful applications, *Nanomater.* **12** (2022) 1930;
- [2] B.-O. Taranu, M.-G. Ivanovici, P. Svera, P. Vlazan, P. Sfirloaga, M. Poienar, Ni<sub>110</sub>(HPO<sub>3</sub>)<sub>8</sub>(OH)<sub>6</sub> multifunctional materials: Electrodes for oxygen evolution reaction and potential visible-light active photocatalysts, *J. Alloys Compd.* **848** (2020) 156595;
- [3] M. Poienar, B.-O. Taranu, P. Svera, P. Sfirloaga, P. Vlazan, Disclosing the thermal behaviour, electrochemical and optical properties of synthetic Fe<sub>3</sub>(PO<sub>4</sub>)<sub>2</sub>(OH)<sub>2</sub> materials, *J. Therm. Anal. Calorim.* (2022) 1-17 <https://doi.org/10.1007/s10973-022-11435-z>;
- [4] S. Motoc, F. Manea, C. Orha, A. Pop, Enhanced electrochemical response of diclofenac at a fullerene-carbon nanofiber paste electrode, *Sensors (Switzerland)* **19** (2019) 1332;
- [5] M. Yang, Y. Yang, Y. Liu, G. Shen, R. Yu, Platinum nanoparticles-doped sol-gel/carbon nanotubes composite electrochemical sensors and biosensors, *Biosens. Bioelectron.* **21** (2006) 1125-1131;
- [6] S. Seo, K. Lee, M. Min, Y. Cho, M. Kim, H. Lee, A molecular approach to an electrocatalytic hydrogen evolution reaction on single-layer graphene, *Nanoscale* **9** (2017) 3969-3979;
- [7] G. Cai, L. Zeng, L. He, S. Sun, Y. Tong, J. Zhang, Imine gels based on ferrocene and porphyrin and their electrocatalytic property, *Chem Asian J.* **15** (2020) 1963-1969;
- [8] I.B. Alvarez, Y. Wu, J. Sanchez, Y. Ge, M.V. Ramos-Garcés, T. Chu, T.F. Jaramillo, J.L. Colon, D. Villagran, Cobalt porphyrin intercalation into zirconium phosphate layers for electrochemical water oxidation, *Sustain. Energy Fuels* **5** (2021) 430-437;
- [9] H. Lei, Q. Zhang, Y. Wang, Y. Gao, Y. Wang, Z. Liang, W. Zhang, R. Cao, Significantly boosted oxygen electrocatalysis with cooperation between cobalt and iron porphyrins, *Dalton Trans.* **50** (2021) 5120-5123;
- [10] H. Lv, H. Guo, K. Guo, H. Lei, W. Zhang, H. Zheng, Z. Liang, R. Cao, Substituent position effect of Co porphyrin on oxygen electrocatalysis, *Chin. Chem. Lett.* **32** (2021) 2841-2845.
- [11] H. Qin, Y. Wang, B. Wang, X. Duan, H. Lei, X. Zhang, H. Zheng, W. Zhang, R. Cao, Cobalt porphyrins supported on carbon nanotubes as model catalysts of metal-N<sub>4</sub>/C sites for oxygen electrocatalysis, *J. Energy Chem.* **53** (2021) 77-81;
- [12] I.K. Attatsi, W. Zhu, X. Liang, Noncovalent immobilization of Co(II)porphyrin through axial coordination as an enhanced electrocatalyst on carbon electrode for oxygen reductions and evolutions, *New J. Chem.* **44** (2020) 4340-4345;
- [13] A. Wang, L. Cheng, W. Zhao, X. Shen, W. Zhu, Electrochemical hydrogen and oxygen evolution reactions from a cobalt-porphyrin-based covalent organic polymer, *J. Colloid Interface Sci.* **579** (2020) 598-606;

- 
- [14] Y. Wu, J.M. Veleta, D. Tang, A.D. Price, C.E. Botez, D. Villagran, Efficient electrocatalytic hydrogen gas evolution by a cobalt-porphyrin-based crystalline polymer, *Dalton Trans.* 47 (2018) 8801–8806;
- [15] D.-J. Li, Z.-G. Gu, W. Zhang, Y. Kang, J. Zhang, Epitaxial encapsulation of homodispersed CeO<sub>2</sub> in a cobalt-porphyrin network derived thin film for highly efficient oxygen evolution reaction, *J. Mater. Chem. A* 5 (2017) 20126–20130;
- [16] J. Ma, L. Liu, Q. Chen, M. Yang, D. Wang, Z. Tong, Z. Chen, A facile approach to prepare crumpled CoTMPyP/electrochemically reduced graphene oxide nanohybrid as an efficient electrocatalyst for hydrogen evolution reaction, *Appl. Surf. Sci.* 399 (2017) 535–541;
- [17] S. Bhunia, K. Bhunia, B.C. Patra, S.K. Das, D. Pradhan, A. Bhaumik, A. Pradhan, S. Bhattacharya, Efficacious electrochemical oxygen evolution from novel Co(II) porphyrin-pyrene based conjugated microporous polymer, *ACS Appl. Mater. Interfaces* 11 (2019) 1520–1528;
- [18] H. Sahabudeen, H. Qi, B.A. Glatz, D. Tranca, R. Dong, Y. Hou, T. Zhang, C. Kuttner, T. Lehnert, G. Seifert, U. Kaiser, A. Fery, Z. Zheng, X. Feng, Wafer-sized multifunctional polyimine-based two-dimensional conjugated polymers with high mechanical stiffness, *Nat. Commun.* 7 (2016) 13461;
- [19] J. Sun, H. Yin, P. Liu, Y. Wang, X. Yao, Z. Tang, H. Zhao, Molecular engineering of Ni-/Co-porphyrin multilayers on reduced graphene oxide sheets as bifunctional catalysts for oxygen evolution and oxygen reduction reactions, *Chem. Sci.* 7 (2016) 5640–5646;
- [20] H. Jia, Y. Yao, Y. Gao, D. Lu, P. Du, Pyrolyzed cobalt porphyrin-based conjugated mesoporous polymers as bifunctional catalysts for hydrogen production and oxygen evolution in water, *Chem. Commun.* 52 (2016) 13483–13486;
- [21] H. Jia, Z. Sun, D. Jiang, P. Du, Covalent cobalt porphyrin framework on multi-walled carbon nanotubes for efficient water oxidation at low overpotential, *Chem. Mater.* 27 (2015) 4586–4593;
- [22] D. Huang, J. Lu, S. Li, Y. Luo, C. Zhao, B. Hu, M. Wang, Y. Shen, Fabrication of cobalt porphyrin. Electrochemically reduced graphene oxide hybrid films for electrocatalytic hydrogen evolution in aqueous solution, *Langmuir* 30 (2014) 6990–6998.
